# Supplementary material for: TRPS1 is a Highly Sensitive Marker for Breast Cancer: A Tissue Microarray Study Evaluating More Than 19,000 Tumors From 152 Different Tumor Entities
Source: PubMed Central journal article supplement — Am J Surg Pathol. 2024 Apr 18;48(6):637–51. doi: 10.1097/PAS.0000000000002213 (PMC11093513; doi:10.1097/pas.0000000000002213), 2024-04-18
Supplement: pas-48-637-s004.pdf [file pas-48-637-s004.pdf]

|                                           | HPV status | TRPS1 immunostaining result |              |          |              |            | P      |
|-------------------------------------------|------------|-----------------------------|--------------|----------|--------------|------------|--------|
|                                           |            | n                           | negative (%) | weak (%) | moderate (%) | strong (%) |        |
| All squamous cell cancers                 | negative   | 246                         | 81.7         | 17.5     | 0.8          | 0.0        | 0.1159 |
|                                           | positive   | 196                         | 85.2         | 12.2     | 1.5          | 1.0        |        |
| Oral squamous cell carcinoma              | negative   | 49                          | 61.2         | 38.8     | 0.0          | 0.0        | 0.0361 |
|                                           | positive   | 10                          | 80.0         | 10.0     | 0.0          | 10.0       |        |
| Squamous cell carcinoma of the pharynx    | negative   | 20                          | 75.0         | 25.0     | 0.0          | 0.0        | 0.2325 |
|                                           | positive   | 27                          | 59.3         | 33.3     | 7.4          | 0.0        |        |
| Squamous cell carcinoma of the larynx     | negative   | 43                          | 86.0         | 14.0     | 0.0          | 0.0        | 0.9813 |
|                                           | positive   | 7                           | 85.7         | 14.3     | 0.0          | 0.0        |        |
| Squamous cell carcinoma of the cervix     | negative   | 10                          | 100.0        | 0.0      | 0.0          | 0.0        | 0.5913 |
|                                           | positive   | 65                          | 98.5         | 0.0      | 0.0          | 1.5        |        |
| Squamous cell carcinoma of the vagina     | negative   | 15                          | 86.7         | 6.7      | 6.7          | 0.0        | 0.5264 |
|                                           | positive   | 13                          | 92.3         | 7.7      | 0.0          | 0.0        |        |
| Squamous cell carcinoma of the vulva      | negative   | 51                          | 90.2         | 9.8      | 0.0          | 0.0        | 0.6823 |
|                                           | positive   | 23                          | 87.0         | 13.0     | 0.0          | 0.0        |        |
| Squamous cell carcinoma of the penis      | negative   | 30                          | 73.3         | 6.7      | 3.3          | 0.0        | 0.9529 |
|                                           | positive   | 45                          | 55.6         | 6.7      | 2.2          | 0.0        |        |
| Squamous cell carcinoma of the skin       | negative   | 28                          | 82.1         | 17.9     | 0.0          | 0.0        | 0.5345 |
|                                           | positive   | 1                           | 100.0        | 0.0      | 0.0          | 0.0        |        |
| Squamous cell carcinoma of the anal canal | negative   | 5                           | 100.0        | 0.0      | 0.0          | 0.0        | 0.0852 |
|                                           | positive   | 21                          | 71.4         | 28.6     | 0.0          | 0.0        |        |
