# Supplementary material for: TRPS1 is a Highly Sensitive Marker for Breast Cancer: A Tissue Microarray Study Evaluating More Than 19,000 Tumors From 152 Different Tumor Entities
Source: PubMed Central journal article supplement — Am J Surg Pathol. 2024 Apr 18;48(6):637–51. doi: 10.1097/PAS.0000000000002213 (PMC11093513; doi:10.1097/pas.0000000000002213), 2024-04-18
Supplement: pas-48-637-s005.pdf [file pas-48-637-s005.pdf]

|                                                      | Tumor entity                                                   | on TMA (n) | TRPS1 and GATA3 immunostaining result |                                 |                                 |                                 |                                 |
|------------------------------------------------------|----------------------------------------------------------------|------------|---------------------------------------|---------------------------------|---------------------------------|---------------------------------|---------------------------------|
|                                                      |                                                                |            | analyzable (n)                        | TRPS1 negative / GATA3 negative | TRPS1 negative / GATA3 positive | TRPS1 positive / GATA3 negative | TRPS1 positive / GATA3 positive |
| <b>Tumors of the skin</b>                            | Pilomatricoma                                                  | 35         | 20                                    | 60.0                            | 0.0                             | 40.0                            | 0.0                             |
|                                                      | Basal cell carcinoma of the skin                               | 88         | 44                                    | 100.0                           | 97.7                            | 2.3                             | 0.0                             |
|                                                      | Benign nevus                                                   | 29         | 22                                    | 100.0                           | 0.0                             | 0.0                             | 0.0                             |
|                                                      | Squamous cell carcinoma of the skin                            | 90         | 64                                    | 75.0                            | 14.1                            | 9.4                             | 1.6                             |
|                                                      | Malignant melanoma                                             | 46         | 37                                    | 94.6                            | 2.7                             | 2.7                             | 0.0                             |
|                                                      | Merkel cell carcinoma                                          | 46         | 26                                    | 100.0                           | 0.0                             | 0.0                             | 0.0                             |
| <b>Tumors of the head and neck</b>                   | Squamous cell carcinoma of the larynx                          | 109        | 91                                    | 90.1                            | 1.1                             | 7.7                             | 1.1                             |
|                                                      | Squamous cell carcinoma of the pharynx                         | 60         | 49                                    | 65.3                            | 0.0                             | 34.7                            | 0.0                             |
|                                                      | Oral squamous cell carcinoma (floor of the mouth)              | 130        | 107                                   | 72.9                            | 2.8                             | 21.5                            | 2.8                             |
|                                                      | Pleomorphic adenoma of the parotid gland                       | 50         | 45                                    | 37.8                            | 0.0                             | 62.2                            | 0.0                             |
|                                                      | Warthin tumor of the parotid gland                             | 104        | 94                                    | 100.0                           | 0.0                             | 0.0                             | 0.0                             |
|                                                      | Adenocarcinoma, NOS (Papillary Cystadenocarcinoma)             | 14         | 8                                     | 75.0                            | 0.0                             | 0.0                             | 25.0                            |
|                                                      | Salivary duct carcinoma                                        | 15         | 10                                    | 70.0                            | 0.0                             | 0.0                             | 30.0                            |
|                                                      | Acinic cell carcinoma of the salivary gland                    | 189        | 126                                   | 96.8                            | 1.6                             | 0.0                             | 1.6                             |
|                                                      | Adenocarcinoma NOS of the salivary gland                       | 109        | 73                                    | 79.5                            | 8.2                             | 4.1                             | 8.2                             |
|                                                      | Adenoid cystic carcinoma of the salivary gland                 | 180        | 89                                    | 50.6                            | 2.2                             | 43.8                            | 3.4                             |
|                                                      | Basal cell adenocarcinoma of the salivary gland                | 25         | 19                                    | 78.9                            | 0.0                             | 15.8                            | 5.3                             |
|                                                      | Basal cell adenoma of the salivary gland                       | 101        | 81                                    | 87.7                            | 0.0                             | 12.3                            | 0.0                             |
|                                                      | Epithelial-myoepithelial carcinoma of the salivary gland       | 53         | 48                                    | 52.1                            | 8.3                             | 27.1                            | 12.5                            |
|                                                      | Mucoepidermoid carcinoma of the salivary gland                 | 343        | 239                                   | 87.9                            | 4.2                             | 5.9                             | 2.1                             |
|                                                      | Myoepithelial carcinoma of the salivary gland                  | 21         | 17                                    | 52.9                            | 5.9                             | 29.4                            | 11.8                            |
|                                                      | Myoepithelioma of the salivary gland                           | 11         | 8                                     | 62.5                            | 12.5                            | 25.0                            | 0.0                             |
|                                                      | Oncocytic carcinoma of the salivary gland                      | 12         | 11                                    | 81.8                            | 9.1                             | 9.1                             | 0.0                             |
|                                                      | Polymorphous adenocarcinoma, low grade, of the salivary gland  | 41         | 20                                    | 60.0                            | 0.0                             | 40.0                            | 0.0                             |
|                                                      | Pleomorphic adenoma of the salivary gland                      | 53         | 34                                    | 79.4                            | 0.0                             | 14.7                            | 5.9                             |
| <b>Tumors of the lung, pleura and thymus</b>         | Adenocarcinoma of the lung                                     | 196        | 137                                   | 96.4                            | 0.7                             | 2.9                             | 0.0                             |
|                                                      | Squamous cell carcinoma of the lung                            | 80         | 46                                    | 91.3                            | 2.2                             | 6.5                             | 0.0                             |
|                                                      | Small cell carcinoma of the lung                               | 16         | 10                                    | 100.0                           | 0.0                             | 0.0                             | 0.0                             |
|                                                      | Mesothelioma, epithelioid                                      | 39         | 23                                    | 82.6                            | 8.7                             | 8.7                             | 0.0                             |
|                                                      | Mesothelioma, biphasic                                         | 76         | 44                                    | 72.7                            | 18.2                            | 9.1                             | 0.0                             |
|                                                      | Thymoma                                                        | 29         | 25                                    | 96.0                            | 0.0                             | 4.0                             | 0.0                             |
|                                                      | Lung, neuroendocrine tumor (NET)                               | 19         | 17                                    | 100.0                           | 0.0                             | 0.0                             | 0.0                             |
| <b>Tumors of the female genital tract</b>            | Squamous cell carcinoma of the vagina                          | 78         | 52                                    | 86.5                            | 3.8                             | 7.7                             | 1.9                             |
|                                                      | Squamous cell carcinoma of the vulva                           | 130        | 111                                   | 83.8                            | 4.5                             | 11.7                            | 0.0                             |
|                                                      | Squamous cell carcinoma of the cervix                          | 128        | 111                                   | 90.1                            | 7.2                             | 2.7                             | 0.0                             |
|                                                      | Squamous endometrial carcinoma                                 | 236        | 167                                   | 85.6                            | 0.0                             | 13.8                            | 0.0                             |
|                                                      | Endometrial serous carcinoma                                   | 82         | 52                                    | 80.8                            | 0.0                             | 19.2                            | 0.0                             |
|                                                      | Carcinosarcoma of the uterus                                   | 48         | 29                                    | 89.7                            | 0.0                             | 10.3                            | 0.0                             |
|                                                      | Endometrial carcinoma, high grade, G3                          | 13         | 10                                    | 60.0                            | 0.0                             | 40.0                            | 0.0                             |
|                                                      | Endometrial clear cell carcinoma                               | 8          | 7                                     | 100.0                           | 0.0                             | 0.0                             | 0.0                             |
|                                                      | Endometrioid carcinoma of the ovary                            | 110        | 78                                    | 73.1                            | 3.8                             | 21.8                            | 1.3                             |
|                                                      | Serous carcinoma of the ovary                                  | 559        | 434                                   | 75.8                            | 0.0                             | 24.0                            | 0.0                             |
|                                                      | Mucinous carcinoma of the ovary                                | 96         | 56                                    | 96.4                            | 0.0                             | 3.6                             | 0.0                             |
|                                                      | Clear cell carcinoma of the ovary                              | 50         | 37                                    | 94.6                            | 0.0                             | 5.4                             | 0.0                             |
|                                                      | Carcinosarcoma of the ovary                                    | 47         | 36                                    | 63.9                            | 5.6                             | 27.8                            | 2.8                             |
|                                                      | Brenner tumor                                                  | 9          | 9                                     | 55.6                            | 44.4                            | 0.0                             | 0.0                             |
| <b>Tumors of the breast</b>                          | Invasive breast carcinoma of no special type                   | 1345       | 996                                   | 1.9                             | 6.0                             | 5.6                             | 86.4                            |
|                                                      | Lobular carcinoma of the breast                                | 293        | 195                                   | 0.5                             | 6.7                             | 1.5                             | 91.3                            |
|                                                      | Medullary carcinoma of the breast                              | 26         | 19                                    | 15.8                            | 5.3                             | 31.6                            | 47.4                            |
|                                                      | Tubular carcinoma of the breast                                | 27         | 15                                    | 0.0                             | 0.0                             | 0.0                             | 100.0                           |
|                                                      | Mucinous carcinoma of the breast                               | 58         | 25                                    | 8.0                             | 4.0                             | 0.0                             | 88.0                            |
|                                                      | Phylloides tumor of the breast                                 | 50         | 31                                    | 3.2                             | 38.7                            | 9.7                             | 48.4                            |
| <b>Tumors of the digestive system</b>                | Adenomatous polyp, low-grade dysplasia                         | 50         | 46                                    | 100.0                           | 0.0                             | 0.0                             | 0.0                             |
|                                                      | Adenomatous polyp, high-grade dysplasia                        | 50         | 46                                    | 100.0                           | 0.0                             | 0.0                             | 0.0                             |
|                                                      | Adenocarcinoma of the colon                                    | 1882       | 1509                                  | 99.9                            | 0.0                             | 0.1                             | 0.0                             |
|                                                      | Gastric adenocarcinoma, diffuse type                           | 176        | 140                                   | 99.3                            | 0.7                             | 0.0                             | 0.0                             |
|                                                      | Gastric adenocarcinoma, intestinal type                        | 174        | 133                                   | 97.7                            | 0.8                             | 1.5                             | 0.0                             |
|                                                      | Gastric adenocarcinoma, mixed type                             | 62         | 56                                    | 100.0                           | 0.0                             | 0.0                             | 0.0                             |
|                                                      | Adenocarcinoma of the esophagus                                | 83         | 46                                    | 97.8                            | 0.0                             | 2.2                             | 0.0                             |
|                                                      | Squamous cell carcinoma of the esophagus                       | 76         | 29                                    | 96.6                            | 0.0                             | 3.4                             | 0.0                             |
|                                                      | Squamous cell carcinoma of the anal canal                      | 89         | 66                                    | 71.2                            | 3.0                             | 22.7                            | 3.0                             |
|                                                      | Cholangiocarcinoma                                             | 50         | 47                                    | 100.0                           | 0.0                             | 0.0                             | 0.0                             |
|                                                      | Hepatocellular carcinoma                                       | 50         | 50                                    | 100.0                           | 0.0                             | 0.0                             | 0.0                             |
|                                                      | Ductal adenocarcinoma of the pancreas                          | 612        | 423                                   | 95.7                            | 2.8                             | 1.4                             | 0.0                             |
|                                                      | Pancreatic/Ampullary adenocarcinoma                            | 89         | 71                                    | 100.0                           | 0.0                             | 0.0                             | 0.0                             |
|                                                      | Acinar cell carcinoma of the pancreas                          | 16         | 14                                    | 100.0                           | 0.0                             | 0.0                             | 0.0                             |
|                                                      | Gastrointestinal stromal tumor (GIST)                          | 50         | 46                                    | 82.6                            | 0.0                             | 17.4                            | 0.0                             |
|                                                      | Appendix, neuroendocrine tumor (NET)                           | 22         | 11                                    | 100.0                           | 0.0                             | 0.0                             | 0.0                             |
|                                                      | Colorectal, neuroendocrine tumor (NET)                         | 12         | 9                                     | 100.0                           | 0.0                             | 0.0                             | 0.0                             |
|                                                      | Ileum, neuroendocrine tumor (NET)                              | 49         | 43                                    | 100.0                           | 0.0                             | 0.0                             | 0.0                             |
|                                                      | Pancreas, neuroendocrine tumor (NET)                           | 97         | 89                                    | 98.9                            | 1.1                             | 0.0                             | 0.0                             |
|                                                      | Colorectal, neuroendocrine carcinoma (NEC)                     | 12         | 8                                     | 75.0                            | 12.5                            | 12.5                            | 0.0                             |
|                                                      | Gallbladder, neuroendocrine carcinoma (NEC)                    | 4          | 4                                     | 75.0                            | 25.0                            | 0.0                             | 0.0                             |
|                                                      | Pancreas, neuroendocrine carcinoma (NEC)                       | 14         | 14                                    | 100.0                           | 0.0                             | 0.0                             | 0.0                             |
| <b>Tumors of the urinary system</b>                  | Non-invasive papillary urothelial carcinoma, pTa G2 low grade  | 177        | 145                                   | 0.0                             | 100.0                           | 0.0                             | 0.0                             |
|                                                      | Non-invasive papillary urothelial carcinoma, pTa G2 high grade | 141        | 117                                   | 0.0                             | 100.0                           | 0.0                             | 0.0                             |
|                                                      | Non-invasive papillary urothelial carcinoma, pTa G3            | 187        | 114                                   | 5.3                             | 94.7                            | 0.0                             | 0.0                             |
|                                                      | Urothelial carcinoma, pT2-4 G3                                 | 623        | 466                                   | 26.8                            | 70.6                            | 1.1                             | 1.5                             |
|                                                      | Small cell neuroendocrine carcinoma of the bladder             | 20         | 13                                    | 92.3                            | 7.7                             | 0.0                             | 0.0                             |
|                                                      | Sarcomatoid urothelial carcinoma                               | 25         | 13                                    | 53.8                            | 30.8                            | 7.7                             | 7.7                             |
|                                                      | Clear cell renal cell carcinoma                                | 856        | 542                                   | 99.3                            | 0.7                             | 0.0                             | 0.0                             |
|                                                      | Papillary renal cell carcinoma                                 | 255        | 149                                   | 97.3                            | 2.7                             | 0.0                             | 0.0                             |
|                                                      | Clear cell (tubulo) papillary renal cell carcinoma             | 21         | 12                                    | 91.7                            | 8.3                             | 0.0                             | 0.0                             |
|                                                      | Chromophobe renal cell carcinoma                               | 131        | 91                                    | 94.5                            | 5.5                             | 0.0                             | 0.0                             |
|                                                      | Oncocytoma of the kidney                                       | 177        | 111                                   | 99.1                            | 0.9                             | 0.0                             | 0.0                             |
| <b>Tumors of the male genital organs</b>             | Adenocarcinoma of the prostate, Gleason 3+3                    | 83         | 75                                    | 100.0                           | 0.0                             | 0.0                             | 0.0                             |
|                                                      | Adenocarcinoma of the prostate, Gleason 4+4                    | 80         | 60                                    | 98.3                            | 1.7                             | 0.0                             | 0.0                             |
|                                                      | Adenocarcinoma of the prostate, Gleason 5+5                    | 85         | 76                                    | 96.1                            | 0.0                             | 3.9                             | 0.0                             |
|                                                      | Adenocarcinoma of the prostate (recurrence)                    | 258        | 169                                   | 89.9                            | 2.4                             | 7.7                             | 0.0                             |
|                                                      | Small cell neuroendocrine carcinoma of the prostate            | 19         | 5                                     | 80.0                            | 20.0                            | 0.0                             | 0.0                             |
|                                                      | Seminoma                                                       | 621        | 592                                   | 99.8                            | 0.2                             | 0.0                             | 0.0                             |
|                                                      | Embryonal carcinoma of the testis                              | 50         | 28                                    | 100.0                           | 0.0                             | 0.0                             | 0.0                             |
|                                                      | Yolk sac tumor                                                 | 50         | 31                                    | 67.7                            | 32.3                            | 0.0                             | 0.0                             |
|                                                      | Teratoma                                                       | 50         | 36                                    | 86.1                            | 13.9                            | 0.0                             | 0.0                             |
|                                                      | Squamous cell carcinoma of the penis                           | 80         | 54                                    | 85.2                            | 1.9                             | 11.1                            | 1.9                             |
| <b>Tumors of endocrine organs</b>                    | Adenoma of the thyroid gland                                   | 113        | 102                                   | 100.0                           | 0.0                             | 0.0                             | 0.0                             |
|                                                      | Papillary thyroid carcinoma                                    | 391        | 325                                   | 100.0                           | 0.0                             | 0.0                             | 0.0                             |
|                                                      | Follicular thyroid carcinoma                                   | 154        | 127                                   | 100.0                           | 0.0                             | 0.0                             | 0.0                             |
|                                                      | Medullary thyroid carcinoma                                    | 111        | 89                                    | 100.0                           | 0.0                             | 0.0                             | 0.0                             |
|                                                      | Anaplastic thyroid carcinoma                                   | 45         | 40                                    | 85.0                            | 5.0                             | 5.0                             | 5.0                             |
|                                                      | Adrenal cortical adenoma                                       | 50         | 34                                    | 100.0                           | 0.0                             | 0.0                             | 0.0                             |
|                                                      | Adrenal cortical carcinoma                                     | 26         | 25                                    | 100.0                           | 0.0                             | 0.0                             | 0.0                             |
|                                                      | Pheochromocytoma                                               | 50         | 50                                    | 100.0                           | 0.0                             | 0.0                             | 0.0                             |
| <b>Tumors of haematopoietic and lymphoid tissues</b> | Hodgkin Lymphoma                                               | 103        | 86                                    | 81.4                            | 18.6                            | 0.0                             | 0.0                             |
|                                                      | Small Lymphocytic lymphoma, B-cell type (B-SLL/B-CLL)          | 50         | 39                                    | 100.0                           | 0.0                             | 0.0                             | 0.0                             |
|                                                      | Diffuse large B cell lymphoma (DLBCL)                          | 113        | 93                                    | 97.8                            | 0.0                             | 2.2                             | 0.0                             |
|                                                      | Follicular lymphoma                                            | 88         | 71                                    | 100.0                           | 0.0                             | 0.0                             | 0.0                             |
|                                                      | T-cell Non Hodgkin lymphoma                                    | 25         | 19                                    | 68.4                            | 21.1                            | 10.5                            | 0.0                             |
|                                                      | Mantle cell lymphoma                                           | 18         | 12                                    | 100.0                           | 0.0                             | 0.0                             | 0.0                             |
|                                                      | Marginal zone lymphoma                                         | 16         | 12                                    | 100.0                           | 0.0                             | 0.0                             | 0.0                             |
|                                                      | Diffuse large B-cell lymphoma (DLBCL) in the testis            | 16         | 15                                    | 100.0                           | 0.0                             | 0.0                             | 0.0                             |
|                                                      | Burkitt lymphoma                                               | 5          | 1                                     | 100.0                           | 0.0                             | 0.0                             | 0.0                             |
| <b>Tumors of soft tissue and bone</b>                | Tendosynovial giant cell tumor                                 | 45         | 28                                    | 46.4                            | 0.0                             | 53.6                            | 0.0                             |
|                                                      | Granular cell tumor                                            | 53         | 25                                    | 100.0                           | 0.0                             | 0.0                             | 0.0                             |
|                                                      | Leiomyoma                                                      | 50         | 48                                    | 100.0                           | 0.0                             | 0.0                             | 0.0                             |
|                                                      | Leiomyosarcoma                                                 | 87         | 81                                    | 93.8                            | 0.0                             | 4.9                             | 1.2                             |
|                                                      | Liposarcoma                                                    | 132        | 93                                    | 93.5                            | 1.1                             | 4.3                             | 1.1                             |
|                                                      | Malignant peripheral nerve sheath tumor (MPNST)                | 13         | 11                                    | 63.6                            | 0.0                             | 36.4                            | 0.0                             |
|                                                      | Myofibrosarcoma                                                | 26         | 25                                    | 92.0                            | 4.0                             | 4.0                             | 0.0                             |
|                                                      | Angiosarcoma                                                   | 73         | 47                                    | 97.9                            | 0.0                             | 2.1                             | 0.0                             |
|                                                      | Angiomyolipoma                                                 | 91         | 83                                    | 100.0                           | 0.0                             | 0.0                             | 0.0                             |
|                                                      | Dermatofibrosarcoma protuberans                                | 21         | 14                                    | 100.0                           | 0.0                             | 0.0                             | 0.0                             |
|                                                      | Ganglioneuroma                                                 | 14         | 12                                    | 100.0                           | 0.0                             | 0.0                             | 0.0                             |
|                                                      | Kaposi sarcoma                                                 | 8          | 3                                     | 100.0                           | 0.0                             | 0.0                             | 0.0                             |
|                                                      | Neurofibroma                                                   | 117        | 81                                    | 98.8                            | 0.0                             | 1.2                             | 0.0                             |
|                                                      | Sarcoma, not otherwise specified (NOS)                         | 74         | 65                                    | 83.1                            | 0.0                             | 15.4                            | 1.5                             |
|                                                      | Paraganglioma                                                  | 41         | 30                                    | 56.7                            | 43.3                            | 0.0                             | 0.0                             |
|                                                      | Ewing sarcoma                                                  | 23         | 14                                    | 92.9                            | 0.0                             | 7.1                             | 0.0                             |
|                                                      | Rhabdomyosarcoma                                               | 6          | 5                                     | 80.0                            | 0.0                             | 20.0                            | 0.0                             |
|                                                      | Schwannoma                                                     | 121        | 91                                    | 100.0                           | 0.0                             | 0.0                             | 0.0                             |
|                                                      | Synovial sarcoma                                               | 12         | 10                                    | 0.0                             | 0.0                             | 90.0                            | 10.0                            |
|                                                      | Osteosarcoma                                                   | 43         | 19                                    | 52.6                            | 0.0                             | 47.4                            | 0.0                             |
|                                                      | Chondrosarcoma                                                 | 38         | 13                                    | 84.6                            | 0.0                             | 15.4                            | 0.0                             |
