# Supplementary figures and images for: TRPS1 is a Highly Sensitive Marker for Breast Cancer: A Tissue Microarray Study Evaluating More Than 19,000 Tumors From 152 Different Tumor Entities
Source: PubMed Central journal article supplement — Am J Surg Pathol. 2024 Apr 18;48(6):637–51. doi: 10.1097/PAS.0000000000002213 (PMC11093513; doi:10.1097/pas.0000000000002213), 2024-04-18

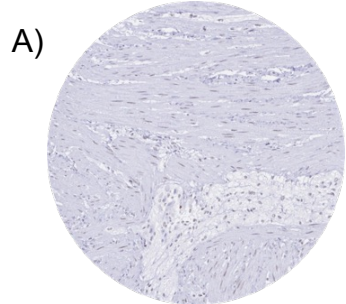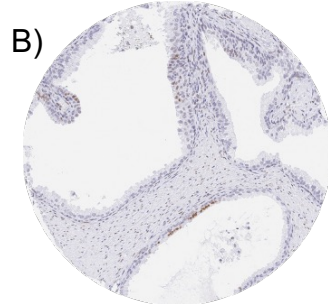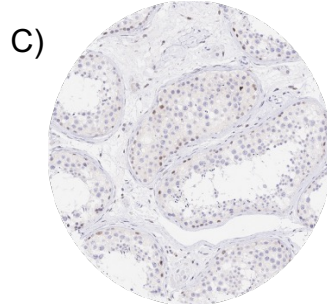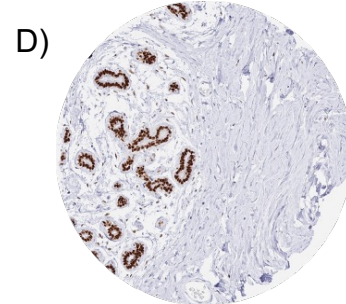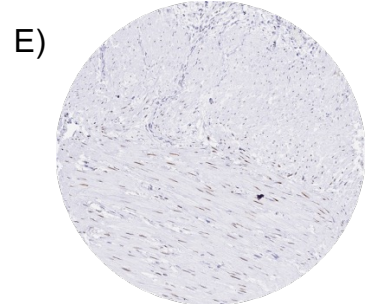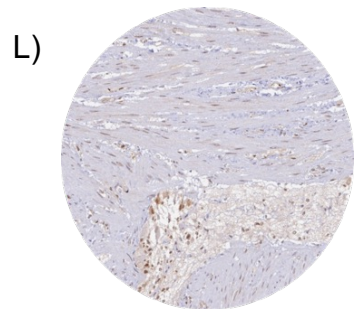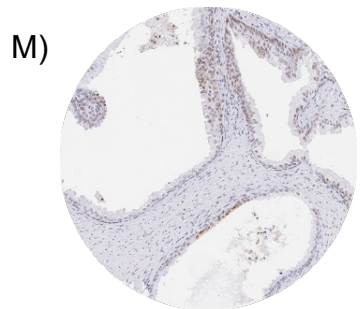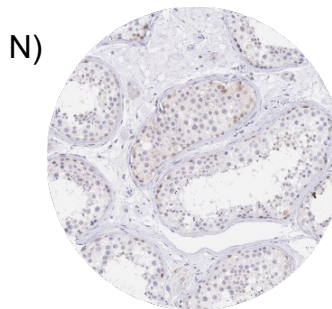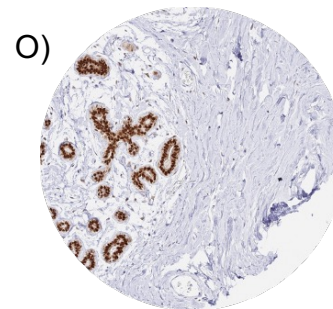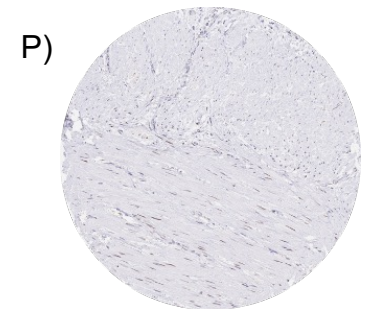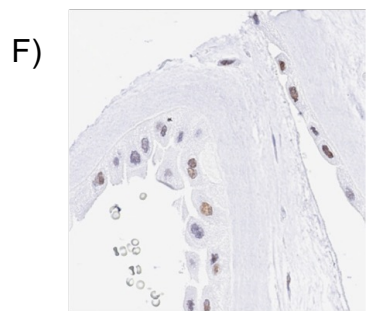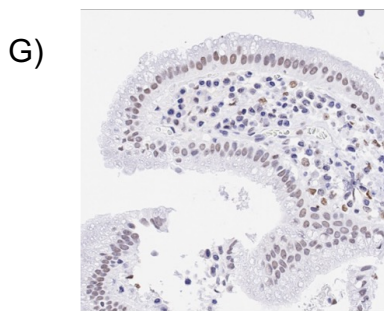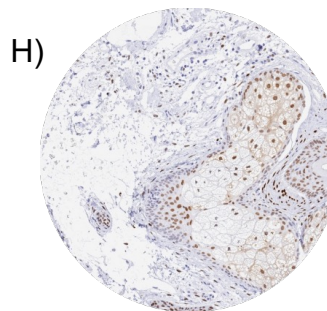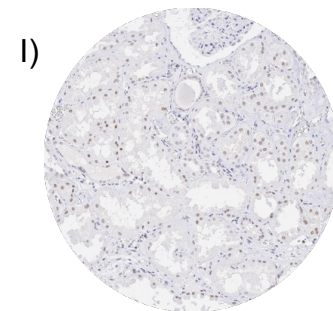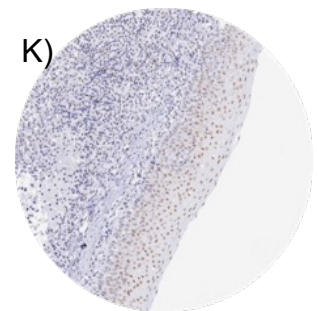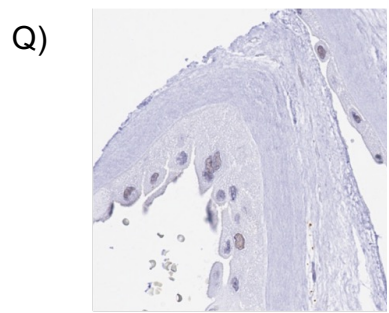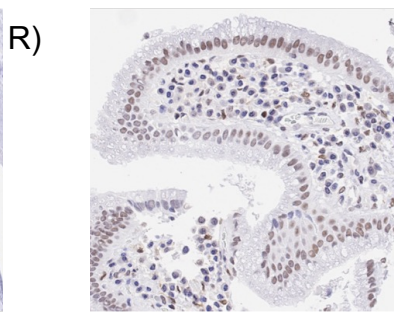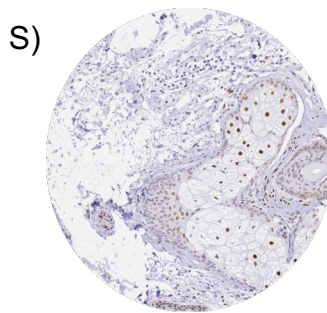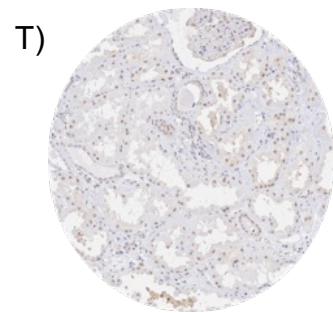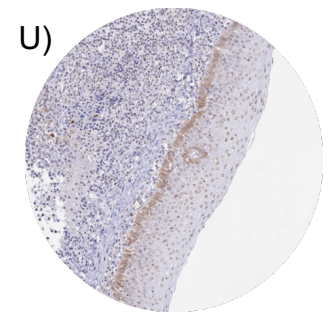

Supplement: pas-48-637-s001.pdf [file pas-48-637-s001.pdf]

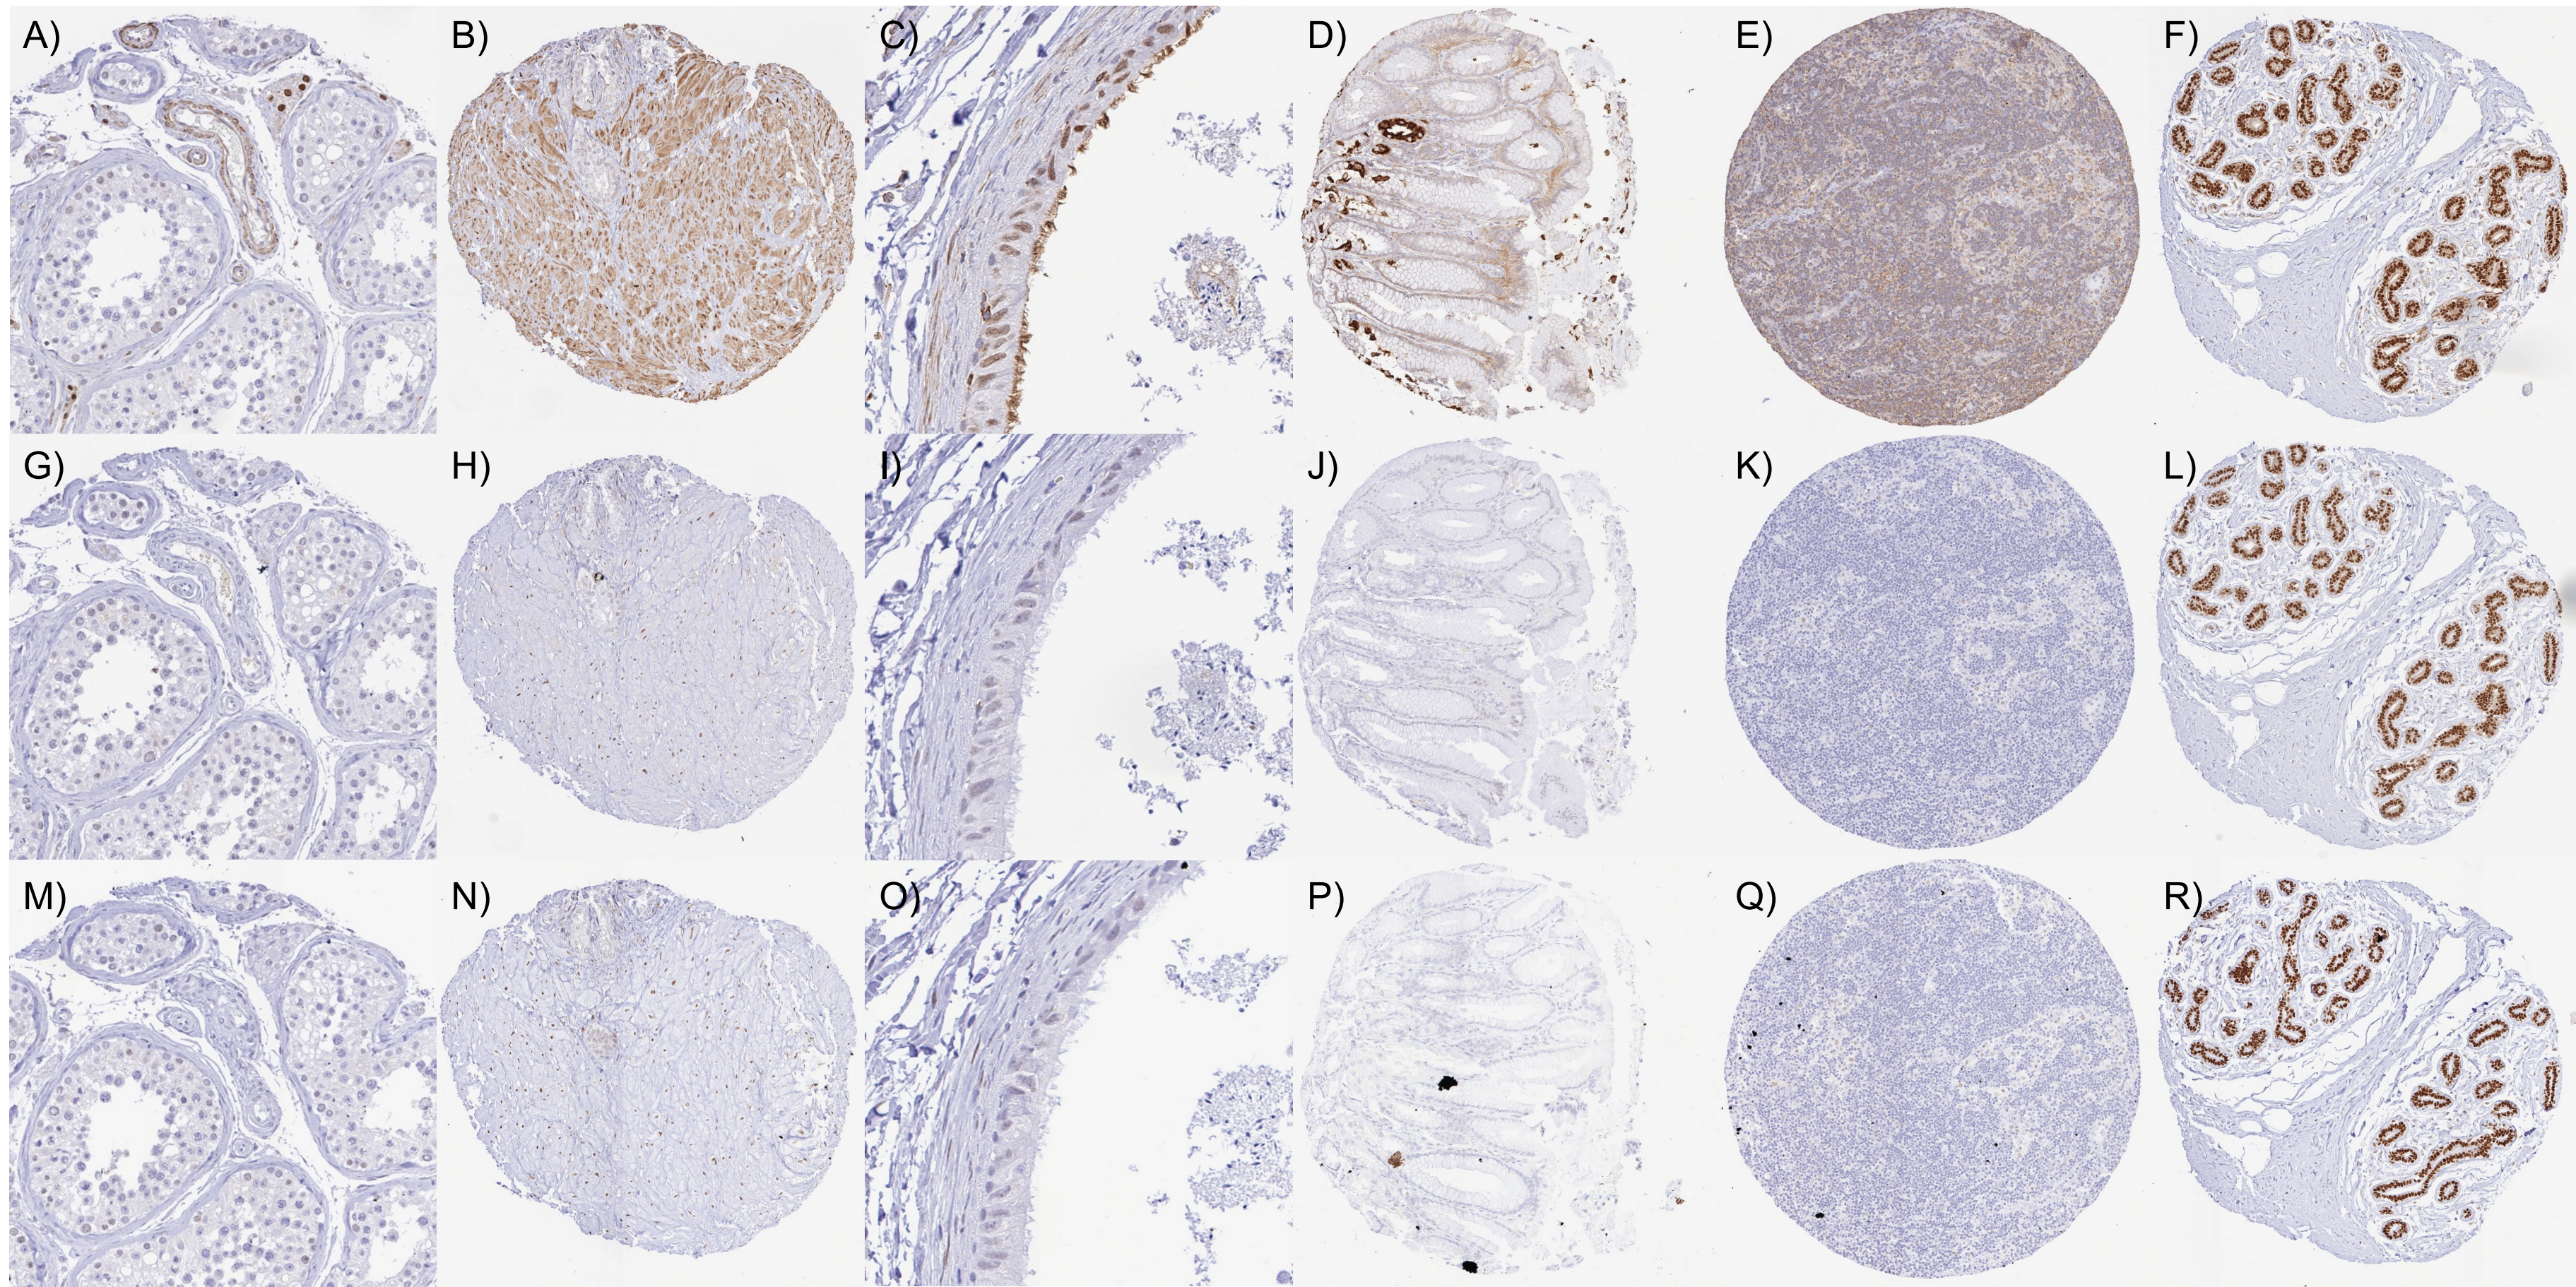

Supplement: pas-48-637-s002.pdf [file pas-48-637-s002.pdf]

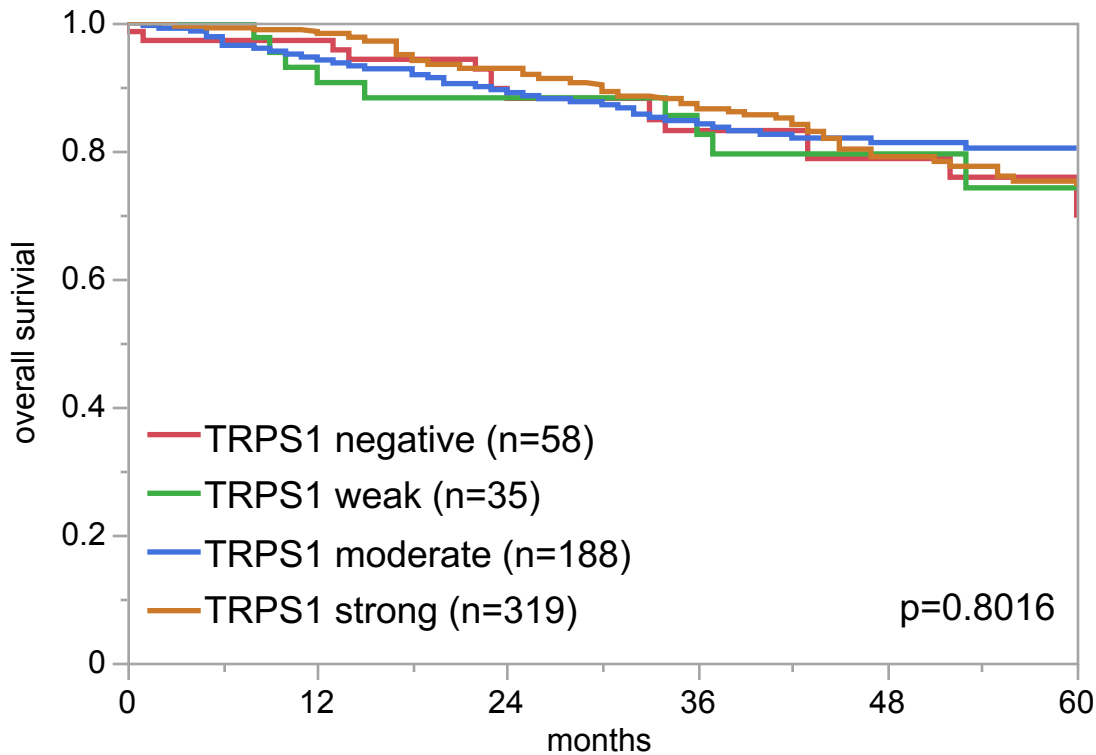

Supplement: pas-48-637-s003.pdf [file pas-48-637-s003.pdf]

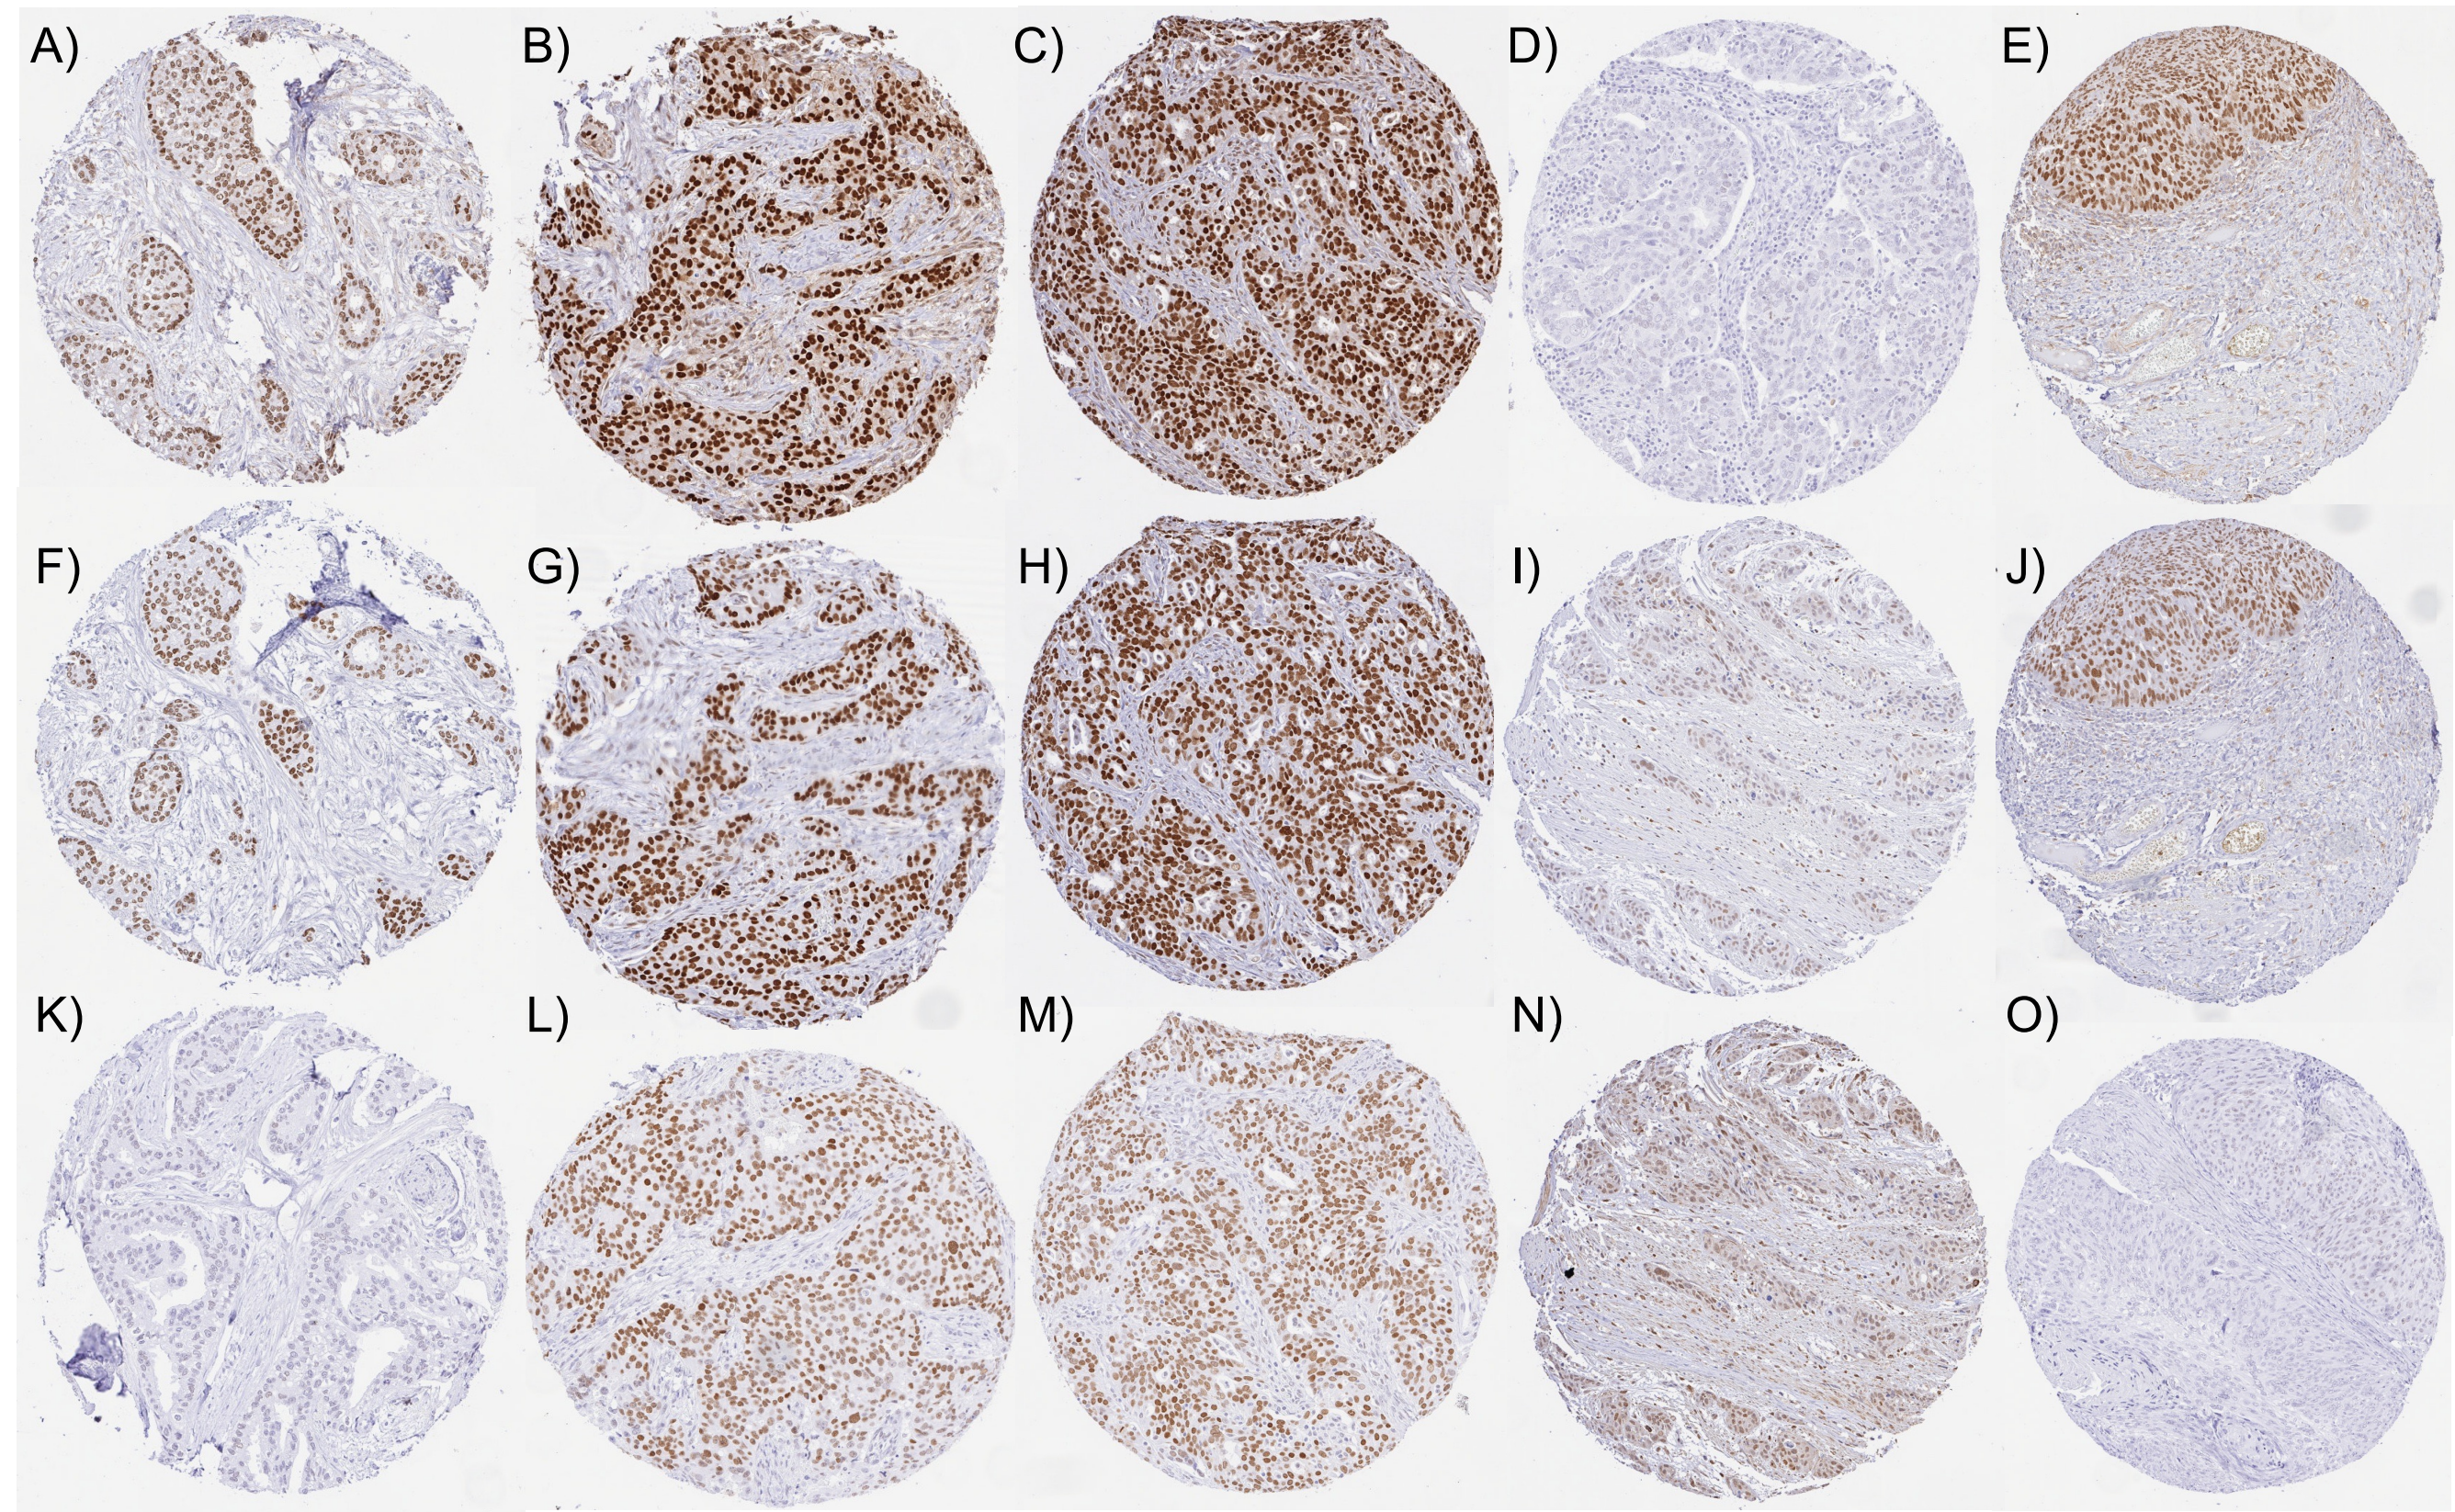

Supplement: pas-48-637-s006.pdf [file pas-48-637-s006.pdf]
